# Supplementary material for: Selection for long and short sleep duration in Drosophila melanogaster reveals the complex genetic network underlying natural variation in sleep
Source: PLoS Genet. 2017 Dec 14;13(12):e1007098. doi: 10.1371/journal.pgen.1007098 (PMC5730107; doi:10.1371/journal.pgen.1007098)
Supplement: S1 Table — For each sleep trait, the ANOVA results are presented. gen, generation; rep, replicate; sel, long or short selection scheme; d.f., degrees of freedom; M.S., Type III mean squares; F, F ratio statistic; P, P-value. (XLSX) [file pgen.1007098.s009.xlsx]

## Sheet: S1 Table
Sleep Trait	Sex	Source	d.f.	M.S.	F	P
Night sleep (min.)	Combined Sexes	gen	13	641192	5.33	0.0001
Night sleep (min.)	Combined Sexes	rep(sel)	2	93797.6	0.37	0.7114
Night sleep (min.)	Combined Sexes	rep×gen(sel)	26	120812	3.11	0.0026
Night sleep (min.)	Combined Sexes	rep×sex(sel)	2	173022	4.52	0.0206
Night sleep (min.)	Combined Sexes	rep×sex×gen(sel)	26	38853.7	3.4	<.0001
Night sleep (min.)	Combined Sexes	sel	1	4.61904e+08	4935.18	0.0002
Night sleep (min.)	Combined Sexes	sel×gen	13	6.80582e+06	56.57	<.0001
Night sleep (min.)	Combined Sexes	sel×sex	1	897688	5.2	0.1501
Night sleep (min.)	Combined Sexes	sel×sex×gen	13	49865.6	1.29	0.2809
Night sleep (min.)	Combined Sexes	sex	1	389258	2.25	0.272
Night sleep (min.)	Combined Sexes	sex×gen	13	39675.8	1.02	0.4587
Night sleep (min.)	Female	sel	1	2.42868e+08	1543.67	0.0006
Night sleep (min.)	Female	rep(sel)	2	158151	1.94	0.1645
Night sleep (min.)	Female	gen	13	310679	3.73	0.0021
Night sleep (min.)	Female	sel×gen	13	3.26121e+06	39.11	<.0001
Night sleep (min.)	Female	rep×gen(sel)	26	84025	7.28	<.0001
Night sleep (min.)	Male	sel	1	2.19061e+08	2127.79	0.0005
Night sleep (min.)	Male	rep(sel)	2	103000	1.4	0.2647
Night sleep (min.)	Male	gen	13	375020	5.05	0.0002
Night sleep (min.)	Male	sel×gen	13	3.62749e+06	48.85	<.0001
Night sleep (min.)	Male	rep×gen(sel)	26	74376.1	6.58	<.0001
Day avg. bout length (min.)	Combined Sexes	gen	13	37424.6	2	0.0648
Day avg. bout length (min.)	Combined Sexes	rep(sel)	2	23276	1.36	0.2883
Day avg. bout length (min.)	Combined Sexes	rep×gen(sel)	26	18835.7	3.74	0.0006
Day avg. bout length (min.)	Combined Sexes	rep×sex(sel)	2	3610.77	0.73	0.4929
Day avg. bout length (min.)	Combined Sexes	rep×sex×gen(sel)	26	5029.75	2.45	<.0001
Day avg. bout length (min.)	Combined Sexes	sel	1	348731	15.02	0.0605
Day avg. bout length (min.)	Combined Sexes	sel×gen	13	25828.1	1.38	0.2352
Day avg. bout length (min.)	Combined Sexes	sel×sex	1	306983	85.12	0.0114
Day avg. bout length (min.)	Combined Sexes	sel×sex×gen	13	6519.5	1.3	0.2741
Day avg. bout length (min.)	Combined Sexes	sex	1	425481	117.98	0.0083
Day avg. bout length (min.)	Combined Sexes	sex×gen	13	9656.93	1.93	0.075
Day avg. bout length (min.)	Female	sel	1	639.984	0.03	0.8785
Day avg. bout length (min.)	Female	rep(sel)	2	21495	1.4	0.2651
Day avg. bout length (min.)	Female	gen	13	26995.8	1.72	0.1156
Day avg. bout length (min.)	Female	sel×gen	13	11967.9	0.76	0.6891
Day avg. bout length (min.)	Female	rep×gen(sel)	26	15809.7	5.86	<.0001
Day avg. bout length (min.)	Male	sel	1	681888	146.1	0.0068
Day avg. bout length (min.)	Male	rep(sel)	2	4669.07	0.59	0.5627
Day avg. bout length (min.)	Male	gen	13	20014	2.5	0.0227
Day avg. bout length (min.)	Male	sel×gen	13	20844.8	2.6	0.0183
Day avg. bout length (min.)	Male	rep×gen(sel)	26	8022.28	5.58	<.0001
Night avg. bout length (min.)	Combined Sexes	gen	13	1.18723e+06	5.56	0.0001
Night avg. bout length (min.)	Combined Sexes	rep(sel)	2	2.89203e+06	7.22	0.0324
Night avg. bout length (min.)	Combined Sexes	rep×gen(sel)	26	214992	3.97	0.0004
Night avg. bout length (min.)	Combined Sexes	rep×sex(sel)	2	243052	4.56	0.0199
Night avg. bout length (min.)	Combined Sexes	rep×sex×gen(sel)	26	54161.5	3.78	<.0001
Night avg. bout length (min.)	Combined Sexes	sel	1	7.617e+07	26.45	0.0358
Night avg. bout length (min.)	Combined Sexes	sel×gen	13	2.0283e+06	9.49	<.0001
Night avg. bout length (min.)	Combined Sexes	sel×sex	1	99145.3	0.41	0.5877
Night avg. bout length (min.)	Combined Sexes	sel×sex×gen	13	29425.1	0.55	0.8733
Night avg. bout length (min.)	Combined Sexes	sex	1	57421.3	0.24	0.6744
Night avg. bout length (min.)	Combined Sexes	sex×gen	13	42571.7	0.79	0.6643
Night avg. bout length (min.)	Female	sel	1	3.95061e+07	54.91	0.0177
Night avg. bout length (min.)	Female	rep(sel)	2	724962	5.8	0.0082
Night avg. bout length (min.)	Female	gen	13	761551	5.97	<.0001
Night avg. bout length (min.)	Female	sel×gen	13	1.06525e+06	8.35	<.0001
Night avg. bout length (min.)	Female	rep×gen(sel)	26	128851	8.19	<.0001
Night avg. bout length (min.)	Male	sel	1	3.6664e+07	15.14	0.0602
Night avg. bout length (min.)	Male	rep(sel)	2	2.42649e+06	17.69	<.0001
Night avg. bout length (min.)	Male	gen	13	463136	3.34	0.0042
Night avg. bout length (min.)	Male	sel×gen	13	1.00442e+06	7.25	<.0001
Night avg. bout length (min.)	Male	rep×gen(sel)	26	138898	10.72	<.0001
Day bout number	Combined Sexes	gen	13	1366.96	3.92	0.0015
Day bout number	Combined Sexes	rep(sel)	2	691.05	3.61	0.09
Day bout number	Combined Sexes	rep×gen(sel)	26	350.224	2.02	0.0391
Day bout number	Combined Sexes	rep×sex(sel)	2	18.0376	0.11	0.9
Day bout number	Combined Sexes	rep×sex×gen(sel)	26	173.17	3.81	<.0001
Day bout number	Combined Sexes	sel	1	55803.6	80.94	0.0121
Day bout number	Combined Sexes	sel×gen	13	1449.61	4.16	0.001
Day bout number	Combined Sexes	sel×sex	1	26813.8	1480.99	0.0006
Day bout number	Combined Sexes	sel×sex×gen	13	738.731	4.28	0.0008
Day bout number	Combined Sexes	sex	1	2715.85	150	0.0063
Day bout number	Combined Sexes	sex×gen	13	160.772	0.93	0.5363
Day bout number	Female	sel	1	77164.7	327.97	0.003
Day bout number	Female	rep(sel)	2	236.297	0.79	0.4652
Day bout number	Female	gen	13	634.076	2.07	0.0548
Day bout number	Female	sel×gen	13	2025.57	6.63	<.0001
Day bout number	Female	rep×gen(sel)	26	307.951	5.65	<.0001
Day bout number	Male	sel	1	2726.44	5.58	0.1419
Day bout number	Male	rep(sel)	2	488.549	2.4	0.1105
Day bout number	Male	gen	13	918.784	4.47	0.0006
Day bout number	Male	sel×gen	13	148.378	0.72	0.7261
Day bout number	Male	rep×gen(sel)	26	205.71	5.59	<.0001
Night bout number	Combined Sexes	gen	13	4132.92	13.04	<.0001
Night bout number	Combined Sexes	rep(sel)	2	1177.96	3.31	0.1364
Night bout number	Combined Sexes	rep×gen(sel)	26	318.206	1.74	0.0825
Night bout number	Combined Sexes	rep×sex(sel)	2	223.412	1.24	0.3053
Night bout number	Combined Sexes	rep×sex×gen(sel)	26	182.992	6.1	<.0001
Night bout number	Combined Sexes	sel	1	1823	1.55	0.3391
Night bout number	Combined Sexes	sel×gen	13	339.569	1.07	0.4221
Night bout number	Combined Sexes	sel×sex	1	694.864	3.12	0.2194
Night bout number	Combined Sexes	sel×sex×gen	13	64.3039	0.35	0.9737
Night bout number	Combined Sexes	sex	1	4659.24	20.9	0.0446
Night bout number	Combined Sexes	sex×gen	13	185.31	1.02	0.465
Night bout number	Female	sel	1	2300.18	4.17	0.1777
Night bout number	Female	rep(sel)	2	553.874	1.91	0.1679
Night bout number	Female	gen	13	2772.65	9.38	<.0001
Night bout number	Female	sel×gen	13	251.211	0.85	0.6095
Night bout number	Female	rep×gen(sel)	26	298.047	8.45	<.0001
Night bout number	Male	sel	1	138.511	0.17	0.723
Night bout number	Male	rep(sel)	2	833.57	4.55	0.0201
Night bout number	Male	gen	13	1534.95	8.31	<.0001
Night bout number	Male	sel×gen	13	152.163	0.82	0.633
Night bout number	Male	rep×gen(sel)	26	185.001	7.43	<.0001
Day sleep (min.)	Combined Sexes	gen	13	221624	1.09	0.4089
Day sleep (min.)	Combined Sexes	rep(sel)	2	2.4799e+06	7.43	0.0217
Day sleep (min.)	Combined Sexes	rep×gen(sel)	26	204348	4.47	0.0001
Day sleep (min.)	Combined Sexes	rep×sex(sel)	2	178251	3.95	0.0316
Day sleep (min.)	Combined Sexes	rep×sex×gen(sel)	26	45757.7	3.21	<.0001
Day sleep (min.)	Combined Sexes	sel	1	9.60317e+07	38.82	0.0248
Day sleep (min.)	Combined Sexes	sel×gen	13	1.96436e+06	9.65	<.0001
Day sleep (min.)	Combined Sexes	sel×sex	1	1.20897e+06	6.8	0.1209
Day sleep (min.)	Combined Sexes	sel×sex×gen	13	65080	1.43	0.2126
Day sleep (min.)	Combined Sexes	sex	1	4.03027e+07	226.62	0.0044
Day sleep (min.)	Combined Sexes	sex×gen	13	46251.9	1.01	0.4671
Day sleep (min.)	Female	sel	1	3.65082e+07	18.62	0.0497
Day sleep (min.)	Female	rep(sel)	2	1.97124e+06	15.76	<.0001
Day sleep (min.)	Female	gen	13	133883	1.05	0.4397
Day sleep (min.)	Female	sel×gen	13	909778	7.13	<.0001
Day sleep (min.)	Female	rep×gen(sel)	26	128685	8.58	<.0001
Day sleep (min.)	Male	sel	1	6.16534e+07	91.44	0.0108
Day sleep (min.)	Male	rep(sel)	2	674574	5.61	0.0094
Day sleep (min.)	Male	gen	13	135426	1.12	0.3902			×
Day sleep (min.)	Male	sel×gen	13	1.13905e+06	9.38	<.0001
Day sleep (min.)	Male	rep×gen(sel)	26	121655	8.98	<.0001
Sleep latency (min.)	Combined Sexes	gen	13	109735	2.3	0.0344
Sleep latency (min.)	Combined Sexes	rep(sel)	2	17750.2	0.49	0.6285
Sleep latency (min.)	Combined Sexes	rep×gen(sel)	26	48060.3	2.15	0.0284
Sleep latency (min.)	Combined Sexes	rep×sex(sel)	2	10951.7	0.5	0.6137
Sleep latency (min.)	Combined Sexes	rep×sex×gen(sel)	26	22402.7	4.45	<.0001
Sleep latency (min.)	Combined Sexes	sel	1	3.39817e+07	1920.4	0.0005
Sleep latency (min.)	Combined Sexes	sel×gen	13	564068	11.81	<.0001
Sleep latency (min.)	Combined Sexes	sel×sex	1	40244.6	3.68	0.1944
Sleep latency (min.)	Combined Sexes	sel×sex×gen	13	13397.5	0.6	0.8312
Sleep latency (min.)	Combined Sexes	sex	1	454494	41.6	0.023
Sleep latency (min.)	Combined Sexes	sex×gen	13	15781.9	0.71	0.7391
Sleep latency (min.)	Female	sel	1	1.53064e+07	7361.3	<.0001
Sleep latency (min.)	Female	rep(sel)	2	2050.73	0.05	0.9513
Sleep latency (min.)	Female	gen	13	61757.8	1.48	0.1926
Sleep latency (min.)	Female	sel×gen	13	240816	5.75	<.0001
Sleep latency (min.)	Female	rep×gen(sel)	26	42252.5	7.43	<.0001
Sleep latency (min.)	Male	sel	1	1.88391e+07	686.7	0.0014
Sleep latency (min.)	Male	rep(sel)	2	27473.6	1.28	0.2955
Sleep latency (min.)	Male	gen	13	61767.2	2.85	0.0111
Sleep latency (min.)	Male	sel×gen	13	336129	15.5	<.0001
Sleep latency (min.)	Male	rep×gen(sel)	26	21735.4	4.95	<.0001
Waking activity (cts./min.)	Combined Sexes	gen	13	8.03727	3.92	0.0015
Waking activity (cts./min.)	Combined Sexes	rep(sel)	2	31.3547	5.62	0.0765
Waking activity (cts./min.)	Combined Sexes	rep×gen(sel)	26	2.05927	3.89	0.0005
Waking activity (cts./min.)	Combined Sexes	rep×sex(sel)	2	4.08306	7.7	0.0022
Waking activity (cts./min.)	Combined Sexes	rep×sex×gen(sel)	26	0.529025	0.9	0.6037
Waking activity (cts./min.)	Combined Sexes	sel	1	21.5991	0.69	0.4934
Waking activity (cts./min.)	Combined Sexes	sel×gen	13	2.57058	1.25	0.3009
Waking activity (cts./min.)	Combined Sexes	sel×sex	1	0.0441842	0.01	0.9266
Waking activity (cts./min.)	Combined Sexes	sel×sex×gen	13	0.963026	1.82	0.0935
Waking activity (cts./min.)	Combined Sexes	sex	1	682.348	167.47	0.0059
Waking activity (cts./min.)	Combined Sexes	sex×gen	13	1.7489	3.3	0.0045
Waking activity (cts./min.)	Female	sel	1	11.3817	1.77	0.3149
Waking activity (cts./min.)	Female	rep(sel)	2	6.46937	5.62	0.0092
Waking activity (cts./min.)	Female	gen	13	2.49172	2.13	0.049
Waking activity (cts./min.)	Female	sel×gen	13	2.04267	1.74	0.1102
Waking activity (cts./min.)	Female	rep×gen(sel)	26	1.1798	4.67	<.0001
Waking activity (cts./min.)	Male	sel	1	10.219	0.34	0.6208
Waking activity (cts./min.)	Male	rep(sel)	2	30.4404	22.36	<.0001
Waking activity (cts./min.)	Male	gen	13	7.30065	5.34	0.0001
Waking activity (cts./min.)	Male	sel×gen	13	1.4827	1.09	0.412
Waking activity (cts./min.)	Male	rep×gen(sel)	26	1.36734	1.51	0.0463
